# Supplementary material for: Convection-Enhanced Delivery In Silico Study for Brain Cancer Treatment
Source: PubMed Central journal article supplement (PMC9177080; doi:10.3389/fbioe.2022.867552), 2022-05-25
Supplement: DataSheet1.pdf [file DataSheet1.pdf]

## *Supplementary Material*

**Supplementary Table 1:** Comparison summary of previous relevant studies with respect to the CED modelling approach of this work.

|                                                                   | <b>(Støverud et al., 2012)</b>                                                                                                                                                   | <b>(Zhan and Wang, 2018)</b>                                                                                                                                                                                                      | <b>(Brady et al., 2020)</b>                                                                                                                                                                                                                                           | <b>Present Study</b>                                                                                                                                                                                     |
|-------------------------------------------------------------------|----------------------------------------------------------------------------------------------------------------------------------------------------------------------------------|-----------------------------------------------------------------------------------------------------------------------------------------------------------------------------------------------------------------------------------|-----------------------------------------------------------------------------------------------------------------------------------------------------------------------------------------------------------------------------------------------------------------------|----------------------------------------------------------------------------------------------------------------------------------------------------------------------------------------------------------|
| Brain tissue model: deformation during CED infusion               | poroelastic model <ul style="list-style-type: none"> <li>• isotropic linear elasticity</li> <li>• small deformations</li> </ul>                                                  | not included (rigid model)                                                                                                                                                                                                        | poroelastic model <ul style="list-style-type: none"> <li>• isotropic linear elasticity</li> <li>• incompressibility</li> </ul>                                                                                                                                        | not included (rigid model)                                                                                                                                                                               |
| drug trans-vascular transport through vasculature (tumor/healthy) | simulated using constant source/sink term for the therapeutic agent (see Eq. (12) therein); adsorption of infused therapeutic agent is neglected.                                | simulated using constant drainage rate of the free drug from blood vessels (vascular permeability to liposomes/doxorubicin, microvascular density; see Eq. (6) therein).                                                          | simulated using constant rate of the free drug (sum of rates due to capillary loss and to irreversible degradation; see Table 1 therein).                                                                                                                             | theory for hindered transport of rigid solutes through liquid filled porous; modeled explicitly effect of drug size and vessel walls' pore size (vascular morphology)                                    |
| CED timescale simulated                                           | during CED infusion (infusion duration: 2 hrs, 12 hrs)                                                                                                                           | during CED infusion (infusion duration: 24 hrs)                                                                                                                                                                                   | during CED infusion (infusion duration: 24 hrs – 72 hrs)                                                                                                                                                                                                              | during and after CED infusion (infusion duration: 6 hrs)                                                                                                                                                 |
| model parameters interrogated in computer simulations             | <ul style="list-style-type: none"> <li>• Tissue permeability</li> <li>• Rigid model vs Elastic model</li> <li>• Elastic Properties (Young's modulus, Poisson's ratio)</li> </ul> | <ul style="list-style-type: none"> <li>• Microvascular density</li> <li>• Drug diffusivity, and vascular permeability</li> <li>• Drug release rate</li> <li>• Infusion rate</li> <li>• Liposome solution concentration</li> </ul> | <ul style="list-style-type: none"> <li>• Drug (therapeutic agent or surrogate) size</li> <li>• Infusion protocol <i>wrt</i> use of multiple catheters placement</li> <li>• Infusion protocol <i>wrt</i> total number of infusions</li> <li>• Infusion rate</li> </ul> | <ul style="list-style-type: none"> <li>• Tissue hydraulic conductivity</li> <li>• Pore size of tumor vessels</li> <li>• Drug (hydrodynamic) size: Drug diffusivity, and vascular permeability</li> </ul> |
| In vivo investigation                                             | included (DTI data from 4 patients to calibrate tissue permeability)                                                                                                             | not included                                                                                                                                                                                                                      | included (CED protocols based on human clinical trials: MR1-1 and D2C7)                                                                                                                                                                                               | not included                                                                                                                                                                                             |

**Supplementary Table 2:** Reflection coefficient and hydrodynamic coefficient definitions.

The reflection coefficient is defined by the expression:  $\sigma_f = 1 - W$ , and the vascular permeability of the drug,  $P$ , is defined by equation (7), where  $W$  and  $H$  correspond to the hydrodynamic coefficients for neutral spheres in cylindrical pores:  $H = 6 \pi F K_t^{-1}$ , and  $W = (2 - F) F K_s K_t^{-1}/2$ , where  $F$  is the partition coefficient:  $F = (1 - \lambda)^2$ ,  $\lambda$  is the ratio of the drug size to the vessel wall pore size. Coefficients  $K_t$  and  $K_s$  are calculated through:

$$\begin{cases} K_t \\ K_s \end{cases} = \frac{9\pi^2}{2\sqrt{2}} (1 - \lambda)^{-2.5} + \left[ 1 + \sum_{n=1}^2 \begin{cases} a_n \\ b_n \end{cases} (1 - \lambda)^n \right] + \sum_{n=0}^4 \begin{cases} a_{n+3} \\ b_{n+3} \end{cases} \lambda^n,$$

where  $a$  and  $b$  are constant coefficients (Deen, 1987).

| Coefficient $a_n$ | Value   | Coefficient $b_n$ | Value  |
|-------------------|---------|-------------------|--------|
| $a_1$             | -1.217  | $b_1$             | 0.117  |
| $a_2$             | 1.534   | $b_2$             | -0.044 |
| $a_3$             | -22.508 | $b_3$             | 4.018  |
| $a_4$             | -5.617  | $b_4$             | -3.979 |
| $a_5$             | -0.336  | $b_5$             | -1.922 |
| $a_6$             | -1.216  | $b_6$             | 4.392  |
| $a_7$             | 1.647   | $b_7$             | 5.006  |

**Supplementary Table 3:** Values of all parameters used in the CED brain model.\* *Normal tissue includes grey and white matter of the brain*

| Parameter      | Description                                            | Domain        | Value                                                                                                                                                                                              | Reference                                                                       |
|----------------|--------------------------------------------------------|---------------|----------------------------------------------------------------------------------------------------------------------------------------------------------------------------------------------------|---------------------------------------------------------------------------------|
| $r_s$          | Drug radius                                            | -             | 0.5, 10, 30 nm                                                                                                                                                                                     | (Koo et al., 2006, Allard et al., 2009)                                         |
| $r_o$          | Vascular wall pore radius                              | Normal tissue | 3.5 nm                                                                                                                                                                                             | (Hobbs et al., 1998, Sarin et al., 2009, Wang et al., 2011)                     |
|                |                                                        | Tumor tissue  | 25, 50, 75 nm                                                                                                                                                                                      |                                                                                 |
| $D_i$          | Drug diffusion coefficient                             | All tissues   | 5.82×10 <sup>-10</sup> m <sup>2</sup> /s for 0.5nm drug radius,<br>9.28×10 <sup>-12</sup> m <sup>2</sup> /s for 10nm drug radius,<br>3.28×10 <sup>-12</sup> m <sup>2</sup> /s for 30nm drug radius | (Pluen et al., 2001)                                                            |
| $k$            | Hydraulic conductivity of tissue interstitial space    | Grey Matter   | 2×10 <sup>-14</sup> m <sup>2</sup> /(Pa.s)                                                                                                                                                         | (Netti et al., 2000, Angeli and Stylianopoulos, 2016, Smith and Humphrey, 2007) |
|                |                                                        | White Matter  | 2×10 <sup>-13</sup> m <sup>2</sup> /(Pa.s)                                                                                                                                                         |                                                                                 |
|                |                                                        | Tumor tissue  | 2×10 <sup>-14</sup> m <sup>2</sup> /(Pa.s)<br>2×10 <sup>-13</sup> m <sup>2</sup> /(Pa.s)<br>2×10 <sup>-13</sup> m <sup>2</sup> /(Pa.s)                                                             |                                                                                 |
| $S_v$          | Vascular density of blood vessels                      | Normal tissue | 70 (cm) <sup>-1</sup>                                                                                                                                                                              | (Mpekris et al., 2017, Jain et al., 2007)                                       |
|                |                                                        | Tumor tissue  | 50 (cm) <sup>-1</sup>                                                                                                                                                                              |                                                                                 |
| $L_{pl}S_{vl}$ | Permeability of Lymphatics                             | Normal tissue | 2.24×10 <sup>-11</sup> m <sup>2</sup> ·s/kg                                                                                                                                                        | (Scallan and Huxley, 2010, Stylianopoulos et al., 2018)                         |
|                |                                                        | Tumor tissue  | 0                                                                                                                                                                                                  |                                                                                 |
| $\gamma$       | Fraction of vessel wall surface area occupied by pores | All tissues   | 1×10 <sup>-3</sup>                                                                                                                                                                                 | (Mpekris et al., 2017)                                                          |
| $C_v$          | Vascular drug concentration                            | All tissues   | 0                                                                                                                                                                                                  | -                                                                               |
| $p_v$          | Vascular pressure of blood vessels                     | All tissues   | 2.0 kPa                                                                                                                                                                                            | (Stylianopoulos et al., 2018)                                                   |
| $p_l$          | Vascular pressure of lymphatic vessels                 | All tissues   | 0.0 kPa                                                                                                                                                                                            | (Voutouri and Stylianopoulos, 2014)                                             |
| $L_{vw}$       | Vessel wall thickness                                  | All tissues   | 5×10 <sup>-6</sup> m                                                                                                                                                                               | (Stylianopoulos et al., 2013)                                                   |
| $T$            | Temperature                                            | All tissues   | 310 K                                                                                                                                                                                              | (Mpekris et al., 2017)                                                          |
| $\mu_i$        | Interstitial fluid viscosity                           | All tissues   | 7.8×10 <sup>-4</sup> Pa.s                                                                                                                                                                          | (Zhan and Wang, 2018,                                                           |

|                 |                             |               |                                    |                          |
|-----------------|-----------------------------|---------------|------------------------------------|--------------------------|
| $\mu$           | Plasma viscosity            | -             | $1.30 \times 10^{-3}$ Pa.s         | Kesmarky et al., 2008)   |
| $\rho$          | Interstitial fluid density  | All tissues   | 1000 kg/m <sup>3</sup>             | (Zhan and Wang, 2018)    |
| $\varepsilon_p$ | Tissue porosity             | All tissues   | 0.3                                | (Linninger et al., 2008) |
| $k_d$           | Drug degradation constant   | All tissues   | $2 \times 10^{-5}$ s <sup>-1</sup> | (Linninger et al., 2008) |
| $k_l$           | Lymphatic drainage constant | Normal tissue | $1 \times 10^{-4}$ s <sup>-1</sup> | (Zhan et al., 2018)      |

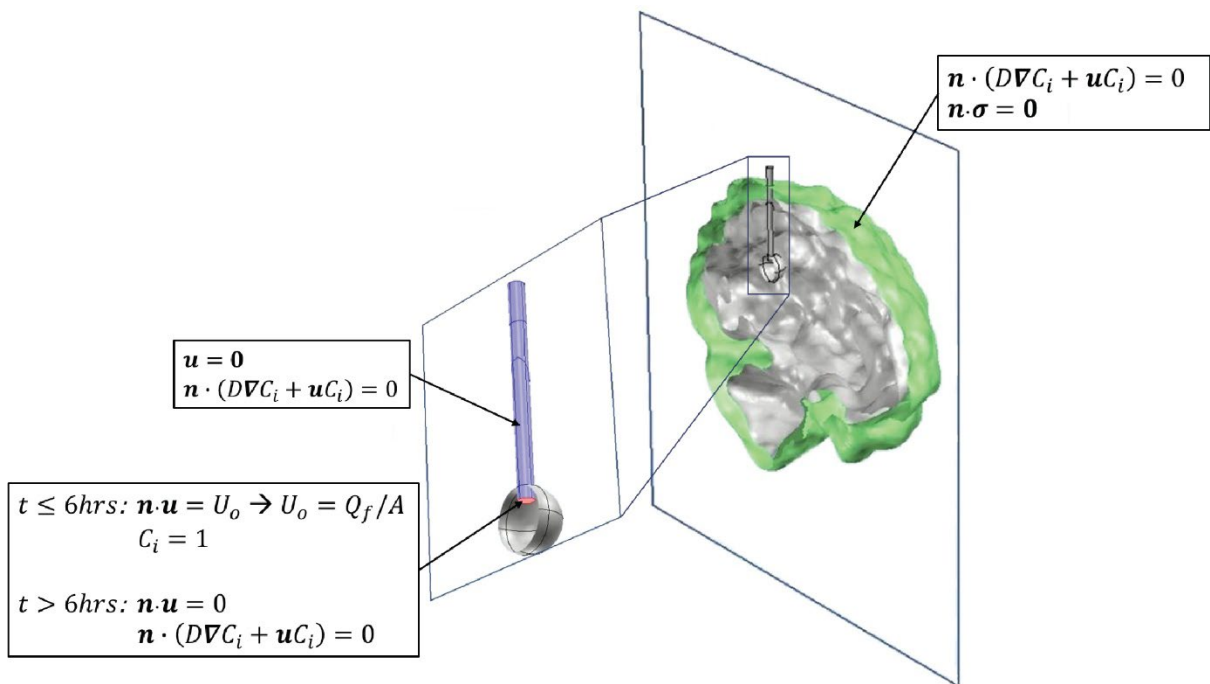

**Supplementary Figure 1.** Boundary conditions of the 3D model. At the interface between the catheter and tumor the normal inlet velocity (*i.e.*,  $U_o = Q_f/A$ ,  $A$  cross section of the catheter) was taken equal to  $1.99 \times 10^{-5}$  m/s and infusion lasted for 6 hours. Also, at the interface of the catheter and tumor tissue, the relative drug concentration was set to unity for the period of the infusion and after completion of infusion, a zero-flux boundary condition was applied (*i.e.*,  $\mathbf{n} \cdot (D\nabla C_i + \mathbf{u} C_i) = 0$ , where  $\mathbf{n}$  corresponds to the outward unit normal vector). The normal stresses on the outer brain surfaces were equal to zero (*i.e.*,  $\mathbf{n} \cdot \boldsymbol{\sigma} = \mathbf{0}$ ). At the catheter surfaces, a no-slip boundary condition was applied for fluid velocity (*i.e.*,  $\mathbf{u} = \mathbf{0}$ ) and additionally, a zero-flux boundary condition was set for the transport of the drugs. The latter boundary condition was also set at the outer brain surfaces.

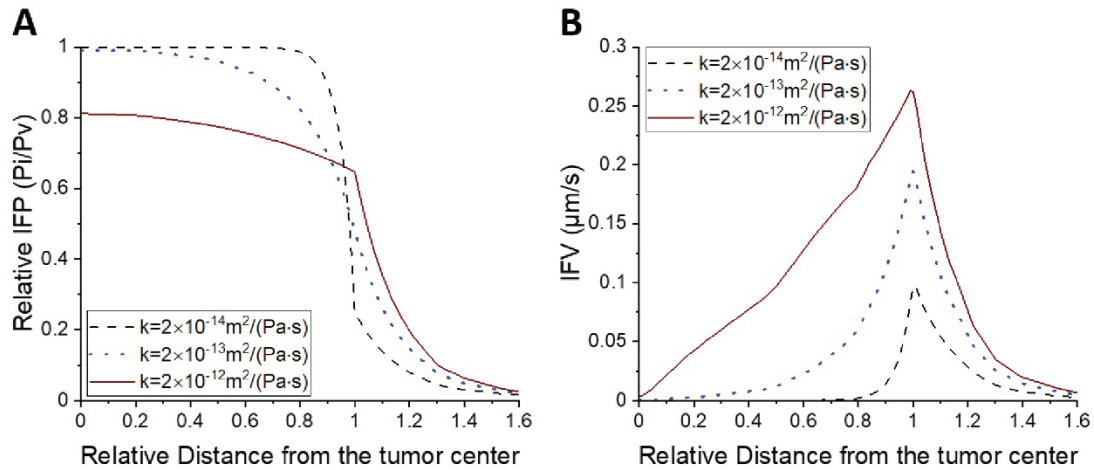

**Supplementary Figure 2.** IFP and IFV as a function of the distance from the tumor center for baseline value of the vessel wall pore diameter. IFP and IFV as a function of the distance from the tumor center for different hydraulic conductivities of the tumor interstitial space and 100 nm diameter of vascular wall pores. *In silico* predicted (A) relative fluid pressure ( $p_i/p_v$ ) and (B) velocity magnitude of the tumor interstitial space before CED administration. IFP is normalized by division with the vascular pressure of blood vessels,  $p_v$ . Distance is normalized by division with the tumor radius.

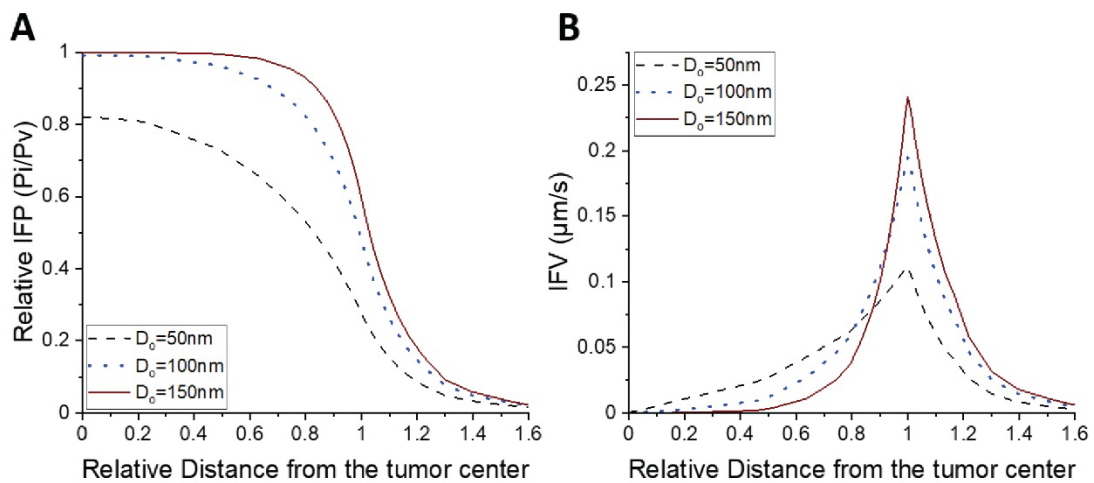

**Supplementary Figure 3.** IFP and IFV as a function of the distance from the tumor center for baseline value of hydraulic conductivity of the tumor interstitial space. IFP and IFV as a function of the distance from the tumor center for different diameters of vascular wall pores and  $2 \times 10^{-13} \text{ m}^2/(\text{Pa}\cdot\text{s})$  hydraulic conductivity of the tumor interstitial space. *In silico* predicted (A) relative fluid pressure ( $p_i/p_v$ ) and (B) velocity magnitude of the tumor interstitial space before CED administration. IFP is normalized by division with the vascular pressure of blood vessels,  $p_v$ . Distance is normalized by division with the tumor radius.

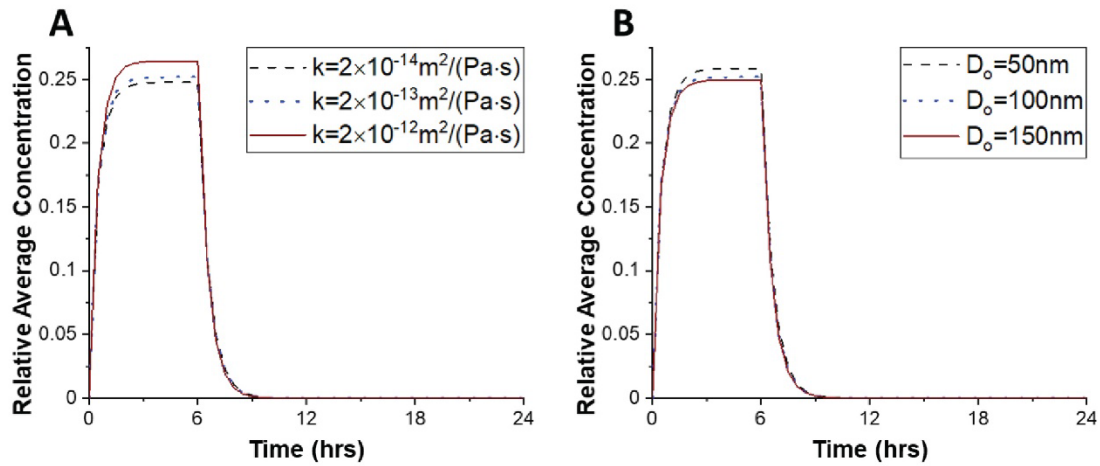

**Supplementary Figure 4.** Average concentration in tumor tissue as a function of time for 1 nm diameter of the therapeutic agent. *In silico* predicted average relative concentration: **(A)** different hydraulic conductivities of the tumor interstitial space and 100 nm diameter of vascular wall pores and **(B)** different diameters of vascular wall pores and  $2 \times 10^{-13} \text{ m}^2/(\text{Pa}\cdot\text{s})$  hydraulic conductivity of the tumor interstitial space. Drug concentration is normalized by division with the reference value entering the catheter.

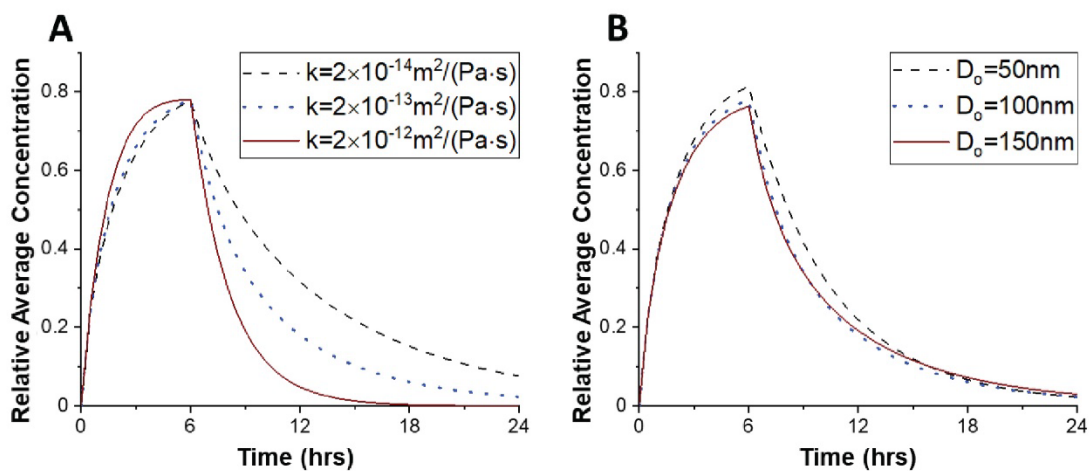

**Supplementary Figure 5.** Average concentration in tumor tissue as a function of the time for 20 nm diameter of the therapeutic agent. *In silico* predicted average relative concentration: **(A)** different hydraulic conductivities of the tumor interstitial space and 100 nm diameter of vascular wall pores and **(B)** different diameters of vascular wall pores and  $2 \times 10^{-13} \text{ m}^2/(\text{Pa}\cdot\text{s})$  hydraulic conductivity of the tumor interstitial space. Drug concentration is normalized by division with the reference value entering the catheter.

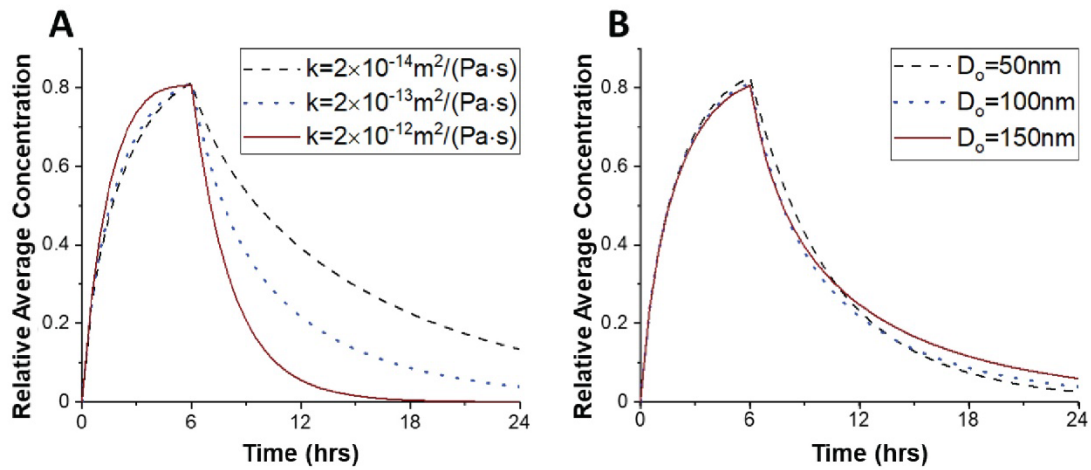

**Supplementary Figure 6.** Average concentration in tumor tissue as a function of the time for 60 nm diameter of the therapeutic agent. *In silico* predicted average relative concentration: **(A)** different hydraulic conductivities of the tumor interstitial space and 100 nm diameter of vascular wall pores and **(B)** different diameters of vascular wall pores and  $2 \times 10^{-13} \text{ m}^2/(\text{Pa}\cdot\text{s})$  hydraulic conductivity of the tumor interstitial space. Drug concentration is normalized by division with the reference value entering the catheter.

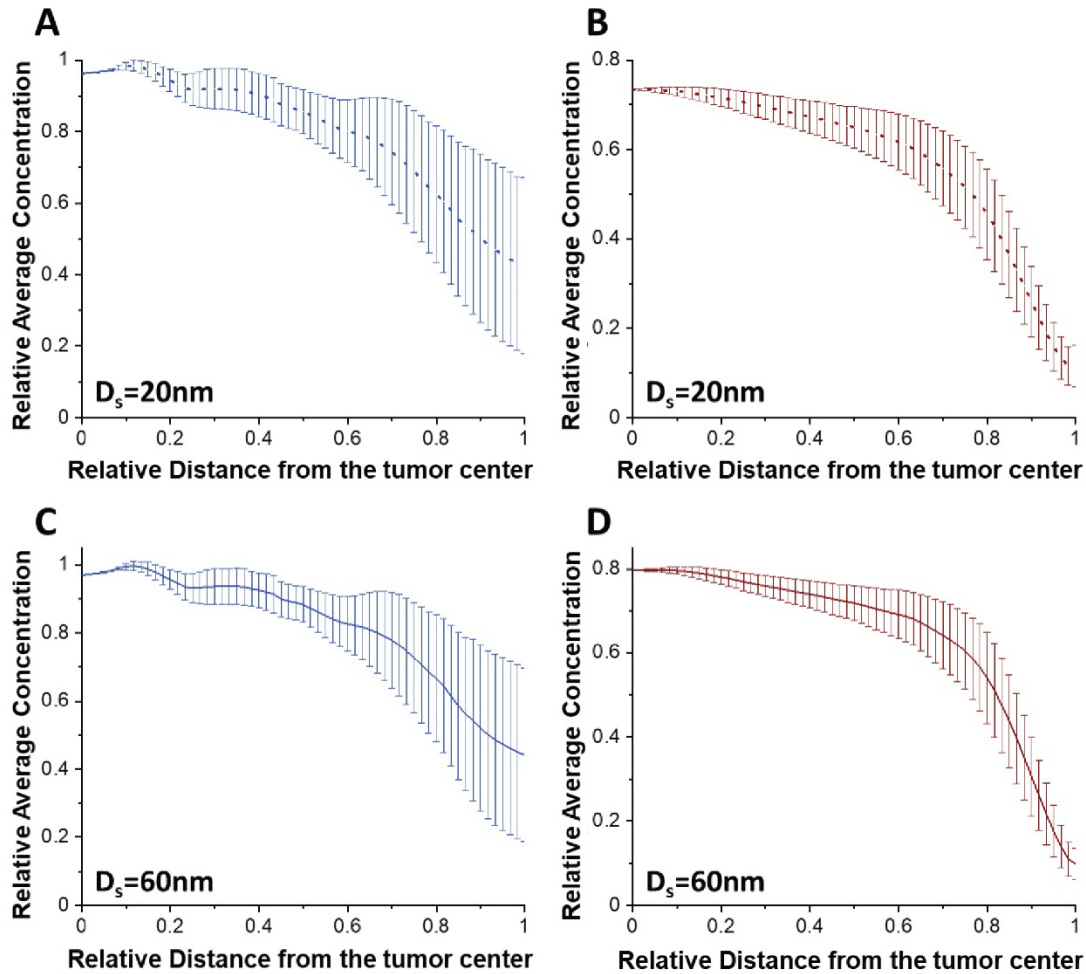

**Supplementary Figure 7.** Average drug concentration as a function of the distance from the tumor center plots for the lowest hydraulic conductivity of the tumor interstitial space.

Average relative concentration calculated along the four directions as a function of the relative distance from the tumor center (**A, C**) after 5 hrs and (**B, D**) after 9 hrs, for  $2 \times 10^{-14} \text{ m}^2/(\text{Pa}\cdot\text{s})$  hydraulic conductivity of the tumor interstitial space, 100 nm different pore diameter of tumor vascular walls, and for different drug diameters: (**A, B**) 20 nm and (**C, D**) 60 nm. Drug concentration is normalized by division with the reference value entering the catheter. Distance is normalized by division with the tumor radius.



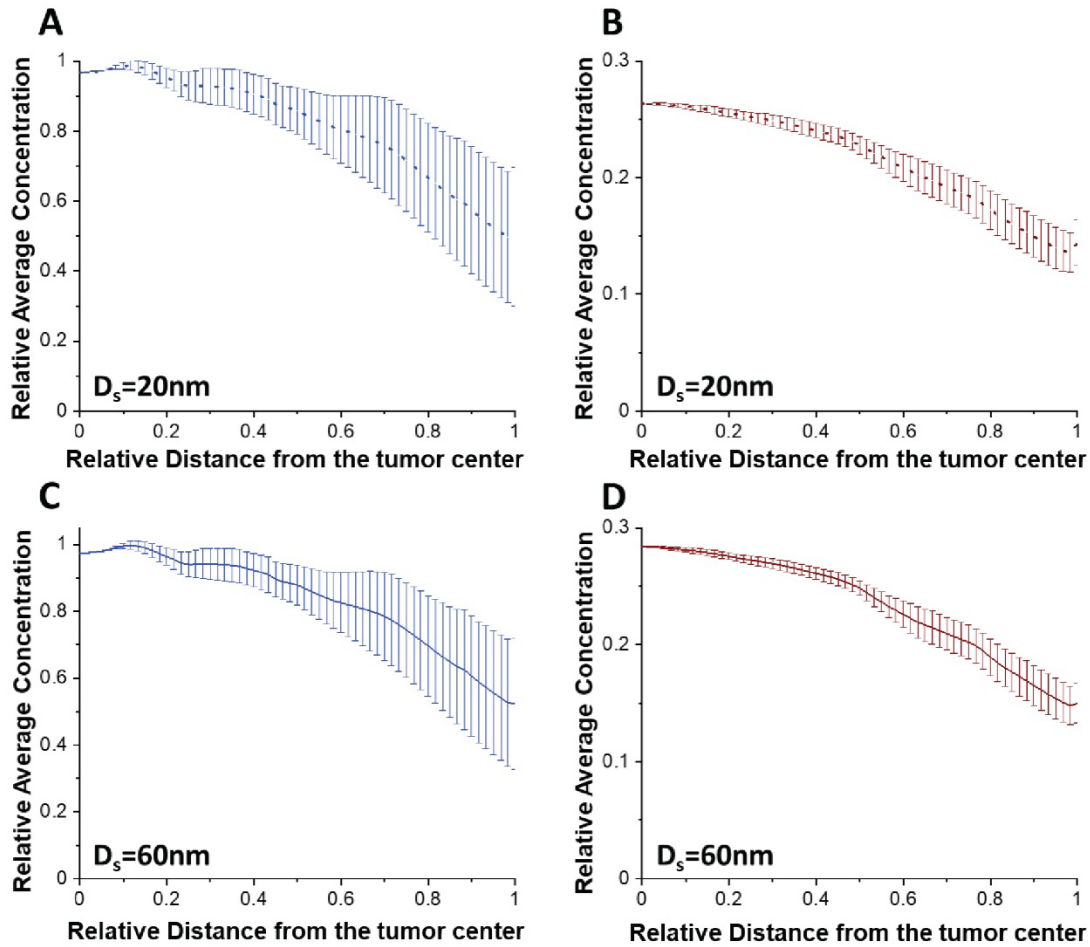

**Supplementary Figure 8.** Average drug concentration as a function of the distance from the tumor center plots for the highest hydraulic conductivity of the tumor interstitial space.

Average relative concentration calculated along the four directions as a function of the relative distance from the tumor center (**A, C**) after 5 hrs and (**B, D**) after 9 hrs, for  $2 \times 10^{-12} \text{ m}^2/(\text{Pa}\cdot\text{s})$  hydraulic conductivity of the tumor interstitial space, 100 nm different pore diameter of tumor vascular walls, and for different drug diameters: (**A, B**) 20 nm and (**C, D**) 60 nm. Drug concentration is normalized by division with the reference value entering the catheter. Distance is normalized by division with the tumor radius.

## References

- ALLARD, E., PASSIRANI, C. & BENOIT, J. P. 2009. Convection-enhanced delivery of nanocarriers for the treatment of brain tumors. *Biomaterials*, 30, 2302-18.
- ANGELI, S. & STYLIANOPOULOS, T. 2016. Biphasic modeling of brain tumor biomechanics and response to radiation treatment. *J Biomech*.
- BRADY, M., RAGHAVAN, R. & SAMPSON, J. 2020. Determinants of Intraparenchymal Infusion Distributions: Modeling and Analyses of Human Glioblastoma Trials. *Pharmaceutics*, 12.
- DEEN, W. M. 1987. Hindered Transport of Large molecules in Liquid-Filled Pores. *AIChE J*, 33, 1409-1425.
- HOBBS, S. K., MONSKY, W. L., YUAN, F., ROBERTS, W. G., GRIFFITH, L., TORCHILIN, V. P. & JAIN, R. K. 1998. Regulation of transport pathways in tumor vessels: role of tumor type and microenvironment. *Proc Natl Acad Sci U S A*, 95, 4607-12.
- JAIN, R. K., TONG, R. T. & MUNN, L. L. 2007. Effect of vascular normalization by antiangiogenic therapy on interstitial hypertension, peritumor edema, and lymphatic metastasis: insights from a mathematical model. *Cancer Res*, 67, 2729-35.
- KESMARKY, G., KENYERES, P., RABAI, M. & TOTH, K. 2008. Plasma viscosity: a forgotten variable. *Clin Hemorheol Microcirc*, 39, 243-6.
- KOO, Y.-E. L., REDDY, G. R., BHOJANI, M., SCHNEIDER, R., PHILBERT, M. A., REHEMTULLA, A., ROSS, B. D. & KOPELMAN, R. 2006. Brain cancer diagnosis and therapy with nanoplatfoms. *Advanced drug delivery reviews*, 58, 1556-1577.
- LINNINGER, A. A., SOMAYAJI, M. R., MEKARSKI, M. & ZHANG, L. 2008. Prediction of convection-enhanced drug delivery to the human brain. *J Theor Biol*, 250, 125-38.
- MPEKRIS, F., BAISH, J. W., STYLIANOPOULOS, T. & JAIN, R. K. 2017. Role of vascular normalization in benefit from metronomic chemotherapy. *Proc Natl Acad Sci U S A*, 114, 1994-1999.
- NETTI, P. A., BERK, D. A., SWARTZ, M. A., GRODZINSKY, A. J. & JAIN, R. K. 2000. Role of extracellular matrix assembly in interstitial transport in solid tumors. *Cancer Res*, 60, 2497-503.
- PLUEN, A., BOUCHER, Y., RAMANUJAN, S., MCKEE, T. D., GOHONGI, T., DI TOMASO, E., BROWN, E. B., IZUMI, Y., CAMPBELL, R. B., BERK, D. A. & JAIN, R. K. 2001. Role of tumor-host interactions in interstitial diffusion of macromolecules: cranial vs. subcutaneous tumors. *Proc Natl Acad Sci U S A*, 98, 4628-33.
- SARIN, H., KANEVSKY, A. S., WU, H., SOUSA, A. A., WILSON, C. M., ARONOVA, M. A., GRIFFITHS, G. L., LEAPMAN, R. D. & VO, H. Q. 2009. Physiologic upper limit of pore size in the blood-tumor barrier of malignant solid tumors. *J Transl Med*, 7, 51.
- SCALLAN, J. P. & HUXLEY, V. H. 2010. In vivo determination of collecting lymphatic vessel permeability to albumin: a role for lymphatics in exchange. *J Physiol*, 588, 243-54.
- SMITH, J. H. & HUMPHREY, J. A. 2007. Interstitial transport and transvascular fluid exchange during infusion into brain and tumor tissue. *Microvasc Res*, 73, 58-73.
- STØVERUD, K. H., DARCIS, M., HELMIG, R. & HASSANIZADEH, S. M. 2012. Modeling concentration distribution and deformation during convection-enhanced drug delivery into brain tissue. *Transport in porous media*, 92, 119-143.
- STYLIANOPOULOS, T., MARTIN, J. D., SNUDERL, M., MPEKRIS, F., JAIN, S. R. & JAIN, R. K. 2013. Coevolution of solid stress and interstitial fluid pressure in tumors during progression: Implications for vascular collapse. *Cancer research*, 73, 3833-3841.
- STYLIANOPOULOS, T., MUNN, L. L. & JAIN, R. K. 2018. Reengineering the Physical Microenvironment of Tumors to Improve Drug Delivery and Efficacy: From Mathematical Modeling to Bench to Bedside. *Trends Cancer*, 4, 292-319.
- VOUTOURI, C. & STYLIANOPOULOS, T. 2014. Evolution of osmotic pressure in solid tumors. *J Biomech*, 47, 3441-7.
- WANG, J., LU, Z., GAO, Y., WIENTJES, M. G. & AU, J. L. 2011. Improving delivery and efficacy of nanomedicines in solid tumors: role of tumor priming. *Nanomedicine (Lond)*, 6, 1605-20.

ZHAN, W., ALAMER, M. & XU, X. Y. 2018. Computational modelling of drug delivery to solid tumour: Understanding the interplay between chemotherapeutics and biological system for optimised delivery systems. *Adv Drug Deliv Rev*, 132, 81-103.

ZHAN, W. & WANG, C. H. 2018. Convection enhanced delivery of liposome encapsulated doxorubicin for brain tumour therapy. *J Control Release*, 285, 212-229.
